# Supplementary material for: Hetero-metallic active sites coupled with strongly reductive polyoxometalate for selective photocatalytic CO2-to-CH4 conversion in water
Source: PubMed Central journal article supplement — Chem Sci. 2018 Oct 2;10(1):185–90. doi: 10.1039/c8sc03471k (PMC6335638; doi:10.1039/c8sc03471k), 2018-10-02
Supplement: SC-010-C8SC03471K-s001.pdf [file SC-010-C8SC03471K-s001.pdf]

## Supporting Information

### **Hetero-metallic Active Sites Coupled with Strong Reductive Polyoxometalate for Selectively Photocatalytic CO<sub>2</sub>-to-CH<sub>4</sub> Conversion in Water**

Shuai-Lei Xie<sup>a</sup>, Jiang Liu<sup>b\*</sup>, Long-Zhang Dong<sup>b</sup>, Shun-Li Li<sup>b</sup>, Ya-Qian Lan<sup>\*b</sup>, Zhong-Min Su<sup>\*ac</sup>

<sup>a</sup>*Institute of Functional Material Chemistry, Department of Chemistry, National & Local United Engineering Lab for Power Battery, Northeast Normal University, Changchun 130024, P. R. China. E-mail: zmsu@nenu.edu.cn.*

<sup>b</sup>*School of Chemistry and Materials Science, Jiangsu Key Laboratory of Biofunctional Materials, Nanjing Normal University, Nanjing 210023, P. R. China*

<sup>c</sup>*School of Chemistry and Environmental Engineering, The Collaborative Innovation Center of Optical Materials and Chemistry, CUST, Changchun University of Science and Technology, Changchun 130028, P. R. China.*

## Table of content

### S1. Experimental section

|                                               |    |
|-----------------------------------------------|----|
| Materials and Instruments                     | S4 |
| Single Crystal Structure Determination        | S4 |
| Photocatalytic CO <sub>2</sub> reduction test | S5 |
| Electrochemical measurements                  | S5 |

### S2. Synthesis of compounds of NENU-605, NENU-606 and NENU-607

|                                                                                                   |     |
|---------------------------------------------------------------------------------------------------|-----|
| Syntheses of NENU-605                                                                             | S6  |
| Syntheses of NENU-606                                                                             | S6  |
| Syntheses of NENU-607                                                                             | S6  |
| Figure S1. The photographs of NENU-605 and NENU-606 under an optical microscope                   | S7  |
| Figure S2. The asymmetric units of (a) NENU-605 and (b) NENU-606                                  | S7  |
| Figure S3. The coordination mode of Mn <sup>2+</sup> of NENU-605                                  | S8  |
| Figure S4. Ball and stick representation of {P <sub>4</sub> Mo <sub>6</sub> } basic building unit | S8  |
| Figure S5. View of the hourglass-shaped {Mn(P <sub>4</sub> Mo <sub>6</sub> )} of NENU-605         | S9  |
| Figure S6. The coordination mode of Mn <sup>2+</sup> of NENU-606                                  | S9  |
| Figure S7. The shuttle-shaped second shell ({Na <sub>6</sub> Mn <sub>4</sub> }) of NENU-606       | S10 |
| Figure S8. The topological analysis of NENU-605 and NENU-606                                      | S11 |
| Figure S9. The PXRD patterns of (a) NENU-605 and (b) NENU-606                                     | S12 |
| Figure S10. The TGA curve of NENU-605 and NENU-606                                                | S13 |
| Figure S11. UV-vis diffuse reflectance spectra for NENU-605 and NENU-606                          | S14 |
| Figure S12. Mott-Schottky plot for NENU-605                                                       | S14 |
| Figure S13. Mott-Schottky plot for NENU-606                                                       | S15 |
| Figure S14. Schematic energy-level diagram of NENU-605                                            | S15 |
| Figure S15. Schematic energy-level diagram of NENU-606                                            | S16 |
| Figure S16. GC analysis of the gaseous reaction products by using the TCD                         | S16 |
| Figure S17. Photocurrent responses and EIS Nyquist plots                                          | S17 |
| Figure S18. The recycle experiments of (a) NENU-605 and (b) NENU-606                              | S17 |
| Figure S19. The IR spectra of NENU-605 and NENU-606                                               | S18 |
| Figure S20. XPS analysis of NENU-605                                                              | S18 |

|                                                                                                                        |            |
|------------------------------------------------------------------------------------------------------------------------|------------|
| <b>Figure S21.</b> XPS analysis of <b>NENU-606</b> .....                                                               | <b>S19</b> |
| <b>Figure S22.</b> The additional filtrate reaction .....                                                              | <b>S19</b> |
| <b>Figure S23.</b> The Mass spectra analyses of $^{13}\text{CO}$ recorded under a $^{13}\text{CO}_2$ atmosphere .....  | <b>S20</b> |
| <b>Figure S24.</b> The asymmetric unit and Three-dimensional polyhedron stacking of <b>NENU-607</b> .....              | <b>S20</b> |
| <b>Figure S25.</b> The standard curves of (a) $\text{CO}$ and (b) $\text{CH}_4$ .....                                  | <b>S21</b> |
| <b>Figure S26.</b> The GC on-line curves of <b>NENU-605</b> and <b>NENU-606</b> .....                                  | <b>S21</b> |
| <b>Figure S27.</b> The influence of the reaction solvent .....                                                         | <b>S21</b> |
| <b>Table S1.</b> The research of reaction conditions.....                                                              | <b>S22</b> |
| <b>Table S2.</b> Crystal data and structure refinement for <b>NENU-605</b> , <b>NENU-606</b> and <b>NENU-607</b> ..... | <b>S23</b> |
| <b>Table S3.</b> The selected bond Lengths in Å for <b>NENU-605</b> .....                                              | <b>S24</b> |
| <b>Table S4.</b> The selected bond Lengths in Å for <b>NENU-606</b> .....                                              | <b>S26</b> |
| <b>Reference</b> .....                                                                                                 | <b>S27</b> |

## S1. Experimental section

**Materials and Instruments.** All the chemicals were obtained from commercial sources and were used without further purification. Sodium Molybdat Dihydrat ( $\text{Na}_2\text{MoO}_4 \cdot 2\text{H}_2\text{O}$ ) (99+%), Mo powder (99+%), Phosphoric acid ( $\text{H}_3\text{PO}_4$ ) (85%), Phosphorous acid ( $\text{H}_3\text{PO}_3$ ) (99+%), cobaltous chlorid hexahydrate ( $\text{CoCl}_2 \cdot 6\text{H}_2\text{O}$ ) (99+%), Manganese chloride tetrahydrate ( $\text{MnCl}_2 \cdot 4\text{H}_2\text{O}$ ) (99+%),  $\text{H}_2\text{C}_2\text{O}_4$  (Oxalic acid) and ethylenediamine, N,N-Dimethylformamide (DMF), imidazole (99+%), 2-Aminoterephthalic acid (99+%) were analytical grade and supplied by the Shanghai Reagent Factory. The purity of both  $\text{N}_2$  and  $\text{CO}_2$  are 99.999%. Mo, Co, Mn and P were determined with a Plasma-SPEC(I) ICP atomic emission spectrometer (Jarrell-Ash 1100 + 2000). Infrared spectrum using the KBr pellet was measured on a Bruker Tensor 27 in the range of 4000-400  $\text{cm}^{-1}$ . Thermogravimetric (TG) analysis was carried out on a Netzch STA449F3 analyser at a heating rate of 10  $^\circ\text{C}/\text{min}$  from ambient temperature to 700  $^\circ\text{C}$  under oxygen atmosphere. Elemental analysis (EA) were conducted using an Elementar vario EL III analyzer. The UV-Vis absorption spectra were acquired on a Shimadzu UV-2550 spectrophotometer in the wavelength range of 200–800 nm. The room temperature powder X-ray diffraction (PXRD) spectra were recorded in successive fashion in  $2\theta$  range of 5–50 $^\circ$  on a Rigaku D/Max 2500/PC diffractometer at 40 kV, 100 mA at 293k with a Cu-target tube and a graphite monochromator and Bruker D8 Advance diffractometer. X-ray photoelectron spectroscopy (XPS) was used a Escalab 250Xi instrument from Thermo Scientific equipped with an Al  $\text{K}\alpha$  microfocused X-ray source and the C1s peak at 284.6 eV as internal standard. The irradiation experiments were conducted with a Xe lamp ( $\lambda \geq 420$  nm, 300W). Electrochemical measurements were carried out using an electrochemical workstation CHI 660E. The isotope-labeled experiments were performed using  $^{13}\text{CO}_2$  instead of  $^{12}\text{CO}_2$ , and the products were analyzed using gas chromatography-mass spectrometry (7890A and 5975C, Aglient).

**Single Crystal Structure Determination.** The single-crystal diffraction for **NENU-605** and **NENU-606** were collected on D8 Venture PHOTON 100 CMOS diffractometer (Mo  $\text{K}\alpha$ ,  $\lambda = 0.71073$  Å) at 293K and Data of **NENU-607** was collected on Bruker AXS Apex II CCD diffractometer (Mo  $\text{K}\alpha$ ,  $\lambda = 0.71073$  Å) at 293 K respectively. All non-hydrogen atoms were refined with anisotropic displacement parameters. All structures were solved by the direct method and refined with the full-matrix least-squares technique on  $F^2$  by the SHELX-2014<sup>[1]</sup> program package and Olex-2<sup>[2]</sup> software. All the solvent molecules which are highly disordered and not able to be modeled were treated by the SQUEEZE<sup>[3]</sup> routine in PLATON<sup>[4]</sup>. The topological analyses were performed with TOPOS<sup>[5]</sup>. The detailed structure determination parameters and crystallographic data are given in Table S2. The selected bond lengths of **NENU-605-606** are listed in Table S3-4. CCDC 1855993 (for

**NENU-605**), 1855994 (for **NENU-606**) and 1855992 (for **NENU-607**) contain the supplementary crystallographic data for this paper. These data can be obtained free of charge from The Cambridge Crystallographic Data Centre.

**Photocatalytic CO<sub>2</sub> reduction test.** Photocatalytic CO<sub>2</sub> reduction reaction was performed as follows: TEOA/H<sub>2</sub>O (14:1 v/v, 30 mL) solution was poured into the 100 mL quartz reaction container, containing each photocatalyst (10 mg), [Ru(bpy)<sub>3</sub>] Cl<sub>2</sub>·6H<sub>2</sub>O (0.01 mmol), and the reaction system was saturated by CO<sub>2</sub> for 30 min with a cap at 1 atm CO<sub>2</sub> partial pressure and then irradiated using Xe lamp ( $\lambda \geq 420$  nm, 300W), meanwhile, the reaction system temperature was preserved at 20 °C by circulating cooling water systems. Gaseous product, CO, CH<sub>4</sub> from the reaction mixture, were measured by gas chromatography (GC-7900, CEALIGHT, China) equipped with a flame ionization detector (FID) and a thermal conductivity (TCD).

**Electrochemical measurements.** All electrochemical measurements (photocurrent, the Mott–Schottky spots and EIS) were carried out at ambient environment using the electrochemical workstation (CHI 660e) in a standard three-electrode system: The carbon cloth (CC, 1 cm×1 cm) or ITO glass (1 cm×2 cm) modified with catalyst samples, carbon rod and Ag/AgCl were used as the working electrode, counter electrode and the reference electrode, respectively.

The as-synthesized crystals 2mg were grinded to powder and then dispersed in 1 mL of solvent (990 $\mu$ L EtOH and 10  $\mu$ L 0.5%Nafion) by ultrasonication to form a homogeneous ink. Subsequently, 200  $\mu$ L of the ink was covered onto the both side of ITO glass, and dried in room temperature for photocurrent or Mott–Schottky spots measurements. Similarly, 10mg crystals were dispersed in 1mL 0.5% Nafion aqueous solvent by ultrasonication to form a homogeneous ink, and 50  $\mu$ L of the ink was covered onto the both side of carbon cloth for EIS test.

A Xenon light with an ultraviolet-cutoff filter ( $\lambda > 420$  nm) was applied as the light source for Photocurrent, and 0.5 M Na<sub>2</sub>SO<sub>4</sub> aqueous solution was used as the electrolyte. The Mott–Schottky plots were also measured over an alternating current (AC) frequency of 1,000 Hz, 1,500 Hz and 2000 Hz. These three electrodes were immersed in the 0.2 M Na<sub>2</sub>SO<sub>4</sub> aqueous solution (pH = 6.6). Electrochemical impedance spectra (EIS) measurements were recorded over a frequency range of 100 kHz-0.1Hz with ac amplitude of 20 mV at 0 V, and 0.5 M KHCO<sub>3</sub> aqueous solution was used as the supporting electrolyte.

## S2. Synthesis of compound of NENU-605 and NENU-606

**Syntheses of NENU-605.** NENU-605 tetrameric cluster was hydrothermally synthesized: An aqueous mixture of  $\text{Na}_2\text{MoO}_4 \cdot 2\text{H}_2\text{O}$  (0.33g, 1.38mmol), Mo powder (0.1g, 1.04mmol),  $\text{H}_3\text{PO}_3$  (0.1g, 1.22mmol),  $\text{MnCl}_2 \cdot 4\text{H}_2\text{O}$  (0.2g, 1.00mmol), DMF (0.5mL),  $\text{H}_2\text{C}_2\text{O}_4$  (0.1g, 1.11mmol), and 6mL distilled water was stirred for 30 min, then the critical pH was adjusted to approximately 3 with  $\text{H}_3\text{PO}_4$  (85%) and KOH (1 M), and transfer it to a Teflon-lined reactor and kept temperature at 180 °C for 72 h. After 3 days, it was cooled down to room temperature at the rate of 10 °C / h, Finally, plenty of dark red octahetal crystals of NENU 605 were collected (76% yield based on Mo), washed by distilled water, and air-dried. Elemental anal. Calcd for Mo 36.02; Mn 8.57; P 8.21. Found: Mo 36.05; Mn 8.60; P 8.24%.

**Syntheses of NENU-606.** The preparation of NENU-606 was similar to the method of NENU-605, expect that  $\text{CoCl}_2 \cdot 6\text{H}_2\text{O}$  (0.12g, 0.50mmol) and  $\text{MnCl}_2 \cdot 4\text{H}_2\text{O}$  (0.1g, 0.50mmol) were all added in solution at the same time, and increased the amount of  $\text{Na}_2\text{MoO}_4 \cdot 2\text{H}_2\text{O}$  (0.62g, 2.57mmol), and the organic templates were replaced with Imidazole (0.1g, 1.47mmol) and 2-Aminoterephthalic acid (0.05g, 0.28mmol), increased the addition of distilled water to 8mL. Finally, red octahedral crystals were obtained (62% yield based on Mo), washed by distilled water, and air-dried. Elemental anal. Calcd for Mo 36.68; Co 2.40; Mn 6.65; P 8.49. Found: Mo 37.00; Co 2.37; Mn 6.62; P 8.46%.

**Syntheses of NENU-607.** An aqueous mixture of  $\text{Na}_2\text{MoO}_4 \cdot 2\text{H}_2\text{O}$  (0.33g, 1.38mmol), Mo powder (0.1g, 1.04mmol),  $\text{H}_3\text{PO}_3$  (0.1g, 1.22mmol),  $\text{MnCl}_2 \cdot 4\text{H}_2\text{O}$  (0.1g, 0.50mmol), ethylenediamine (0.2 mL),  $\text{H}_2\text{C}_2\text{O}_4$  (0.05g, 0.56mmol), DMF (1mL) and 6mL distilled water was stirred for 30 min, then the critical pH was adjusted to approximately 3.5 with  $\text{H}_3\text{PO}_4$  (85%), then transfer it to a Teflon-lined reactor and kept temperature at 180 °C for 72 h. After 3 days, it was cooled down to room temperature at the rate of 10 °C / h. Eventually, red sheet crystals were obtained, washed by distilled water, and air-dried. Elemental anal. Calcd for Mo 36.37; Mn 1.74; P 7.83. Found: Mo 39.35; Mn 1.76; P 7.83%.

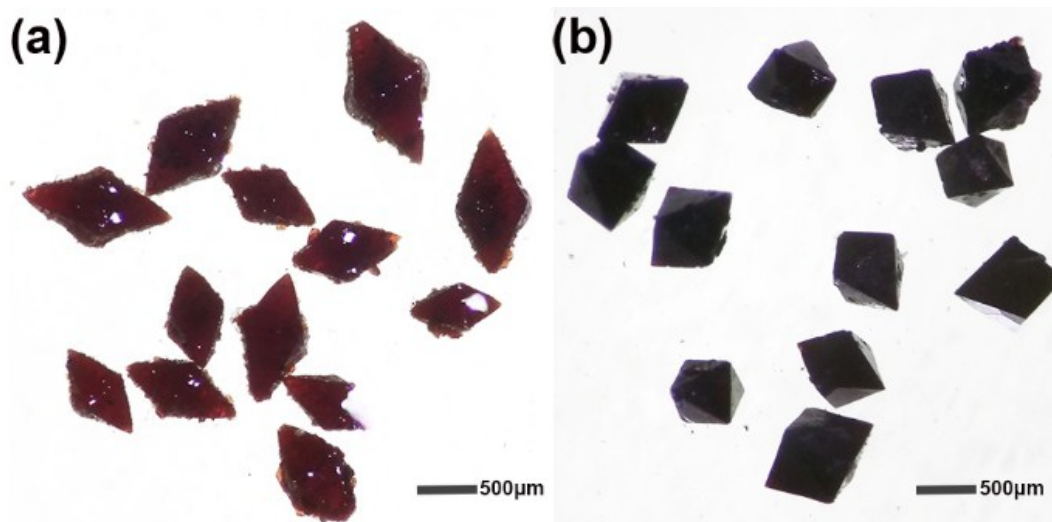

Figure S1. The photographs of **NENU-605** and **NENU-606** under an optical microscope.

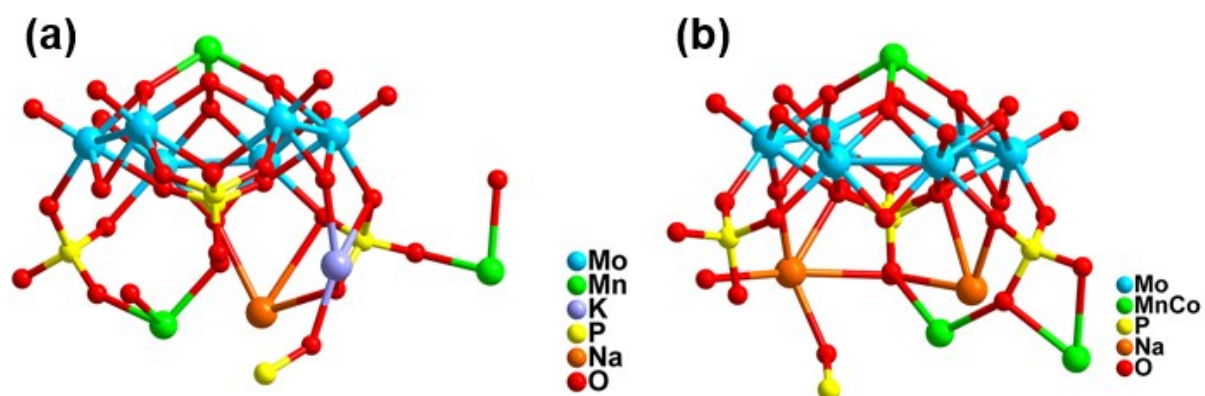

Figure S2. The asymmetric units of (a) **NENU-605** and (b) **NENU-606**.

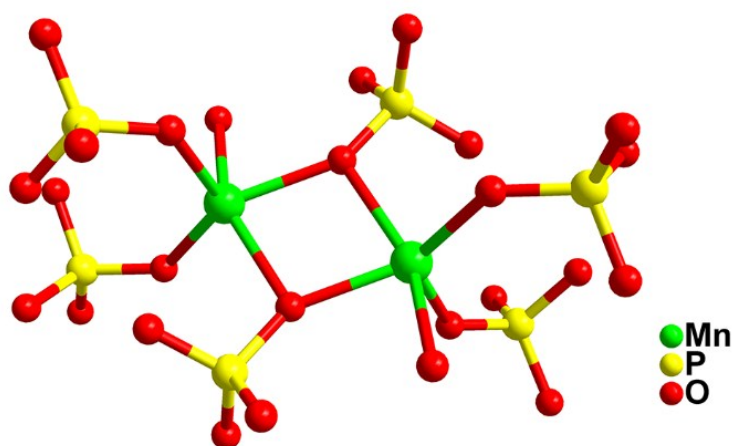

**Figure S3.** The coordination mode of Mn2 (**NENU-605**), which coordinates with five O atoms from four  $\text{PO}_4^{3-}$  groups and one water molecule.

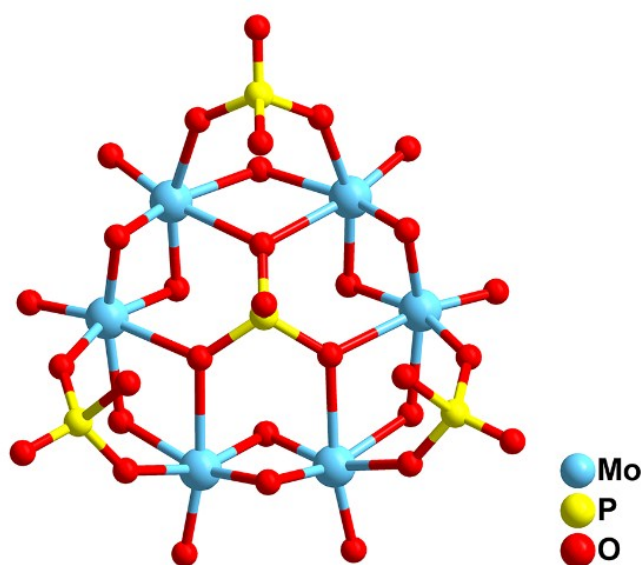

**Figure S4.** Ball and stick representation of  $\{\text{P}_4\text{Mo}_6\}$  basic building unit.

As shown in **Figure S4**, the most basic cell unit is  $\{\text{P}_4\text{Mo}_6\}$ , formed by six  $\{\text{MoO}_6\}$  octahedra and four  $\{\text{PO}_4\}$  tetrahedra via edge- and corner-sharing. All Mo-O and P-O bond lengths were their usual values. The central phosphate group provides three oxygen atoms that bridge the resulting hexanuclear ring, while each of the remaining three peripheral  $\{\text{PO}_4\}$  groups owns two oxygen atoms to span the non-bonding Mo---Mo contacts. The four phosphate groups lie on the same side of the plane. The bond lengths of them are all within the observed range in reduced molybdenum(V) phosphates.



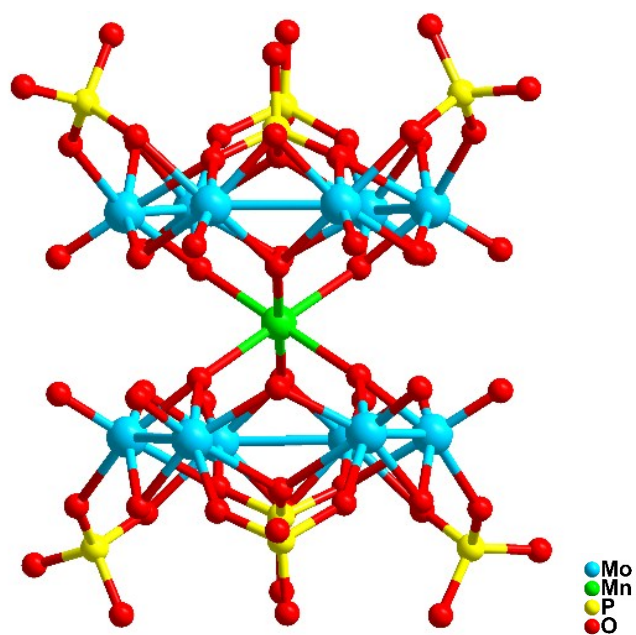

**Figure S5.** View of the hourglass-shaped  $\{\text{Mn}(\text{P}_4\text{Mo}_6)\}$  of **NENU-605**.

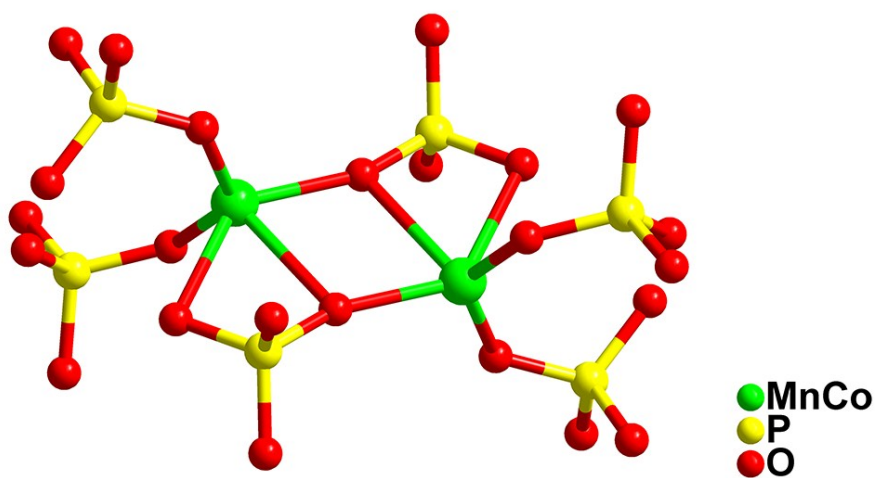

**Figure S6.** The coordination mode of  $\text{Mn}_2$  (**NENU-606**), which coordinates with five O atoms from four  $\text{PO}_4^{3-}$  groups.

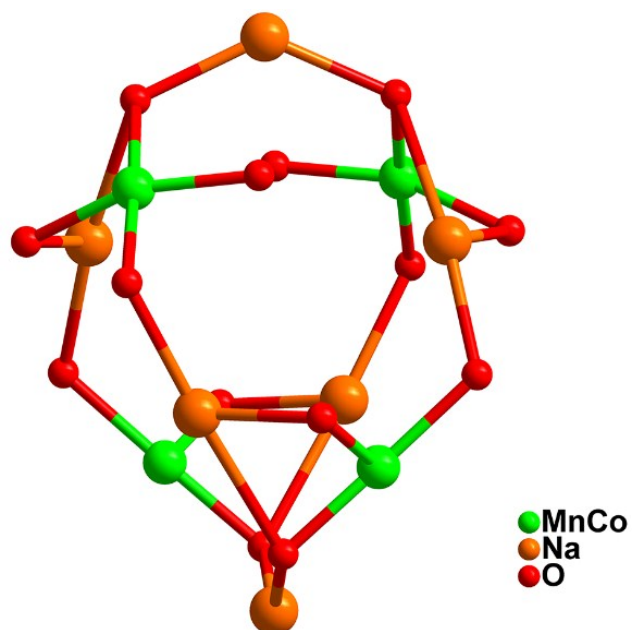

**Figure S7.** The shuttle-shaped second shell ( $\{Na_6Mn_4\}$ ) of **NENU-606**, in which the locations of K1 atoms are fully replaced by Na atoms compared with **NENU-605**.

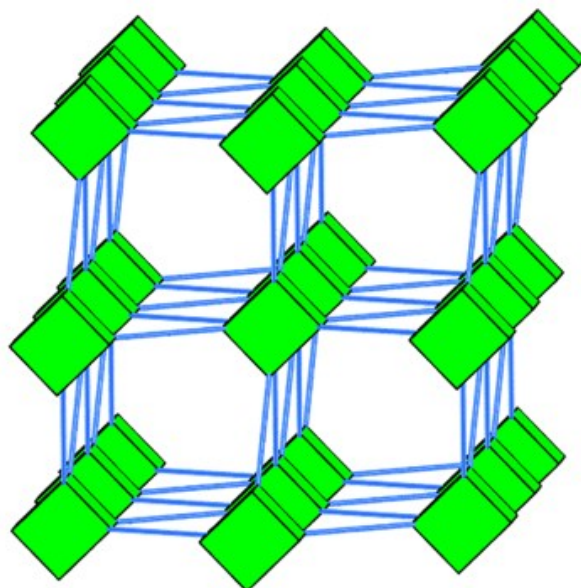

**Figure S8.** The topological analysis of **NENU-605** and **NENU-606**.

From the topological point of view, if the and Mn2/Mn3 atom are regarded as 8-connected nodes and linkers respectively, then the skeletons of **NENU-605** and **NENU-606** feature a unimodal topology with the Schläfli symbol of  $4^{24} \cdot 6^4$ . And their structures are classical body centered cubic lattice (bcu, sometimes called the CsCl net). The bcu topology is very common in metal–organic frameworks, but rare in POM-based compounds.

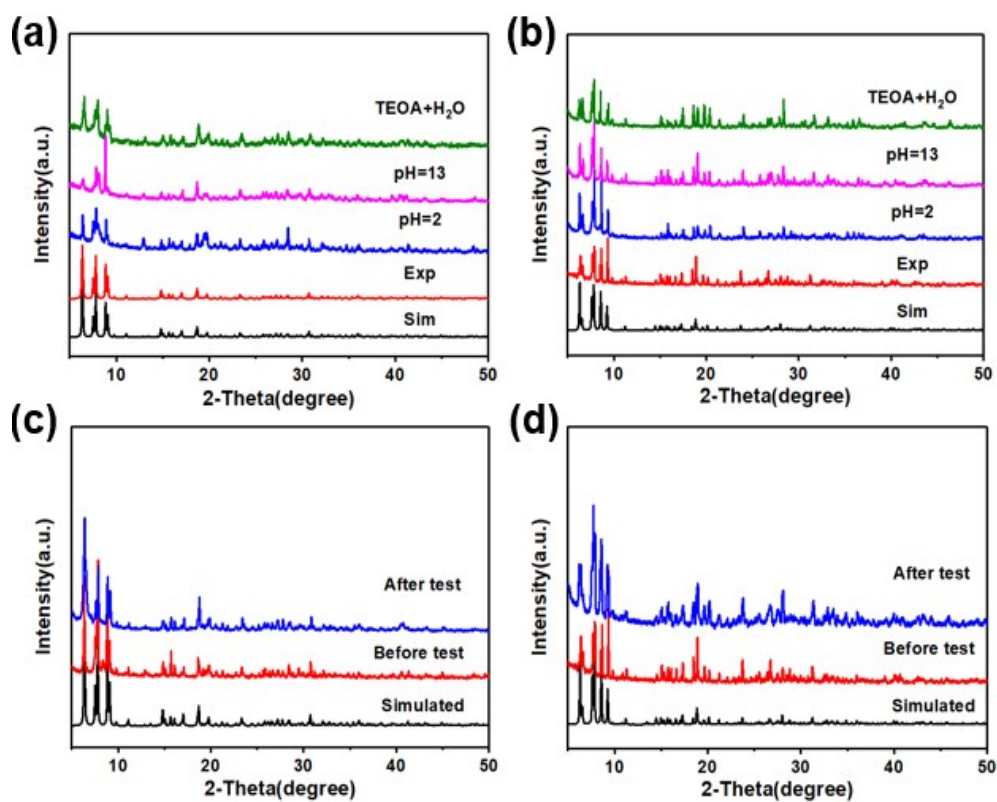

**Figure S9.** The PXRD patterns of (a) NENU-605 and (b) NENU-606 under the conditions of indicated pH values and photocatalytic reaction solution (H<sub>2</sub>O: TEOA = 14:1 v/v, 30 mL); the PXRD patterns of (c) NENU-605 and (d) NENU-606 before and after photocatalytic reaction.

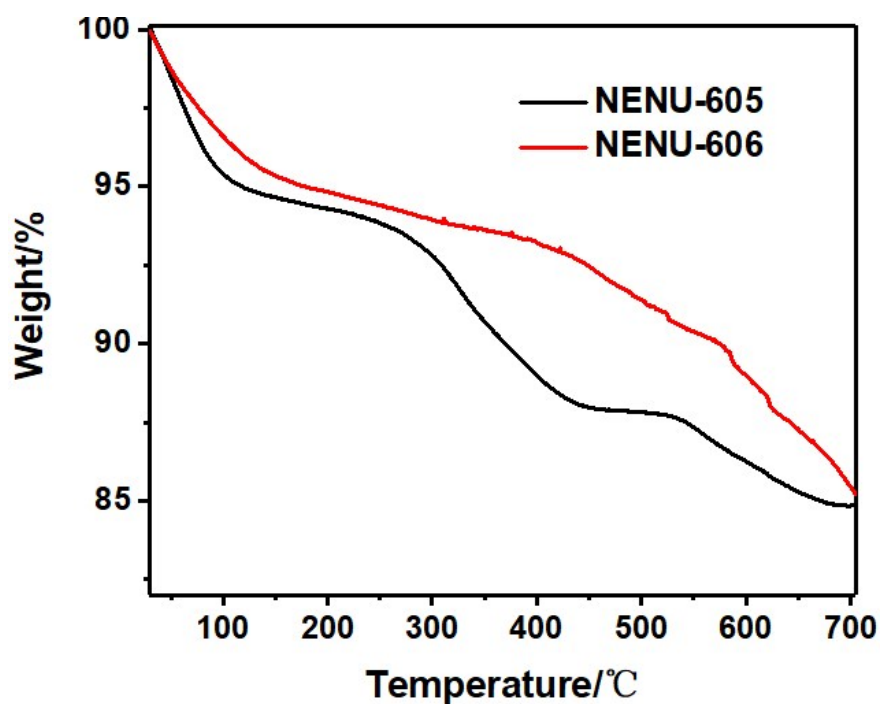

**Figure S10.** The TGA curve of **NENU-605** and **NENU-606** measured under  $O_2$  atmosphere from room temperature to 700 °C at the heating rate of  $10\text{ °C} \cdot \text{min}^{-1}$ . A continuous weight loss of 5.95% step from 40 to 230 °C for **NENU-605** and 6.34% step from 40 to 350 °C for **NENU-606** corresponding to the loss of all lattice and coordinated water molecules.

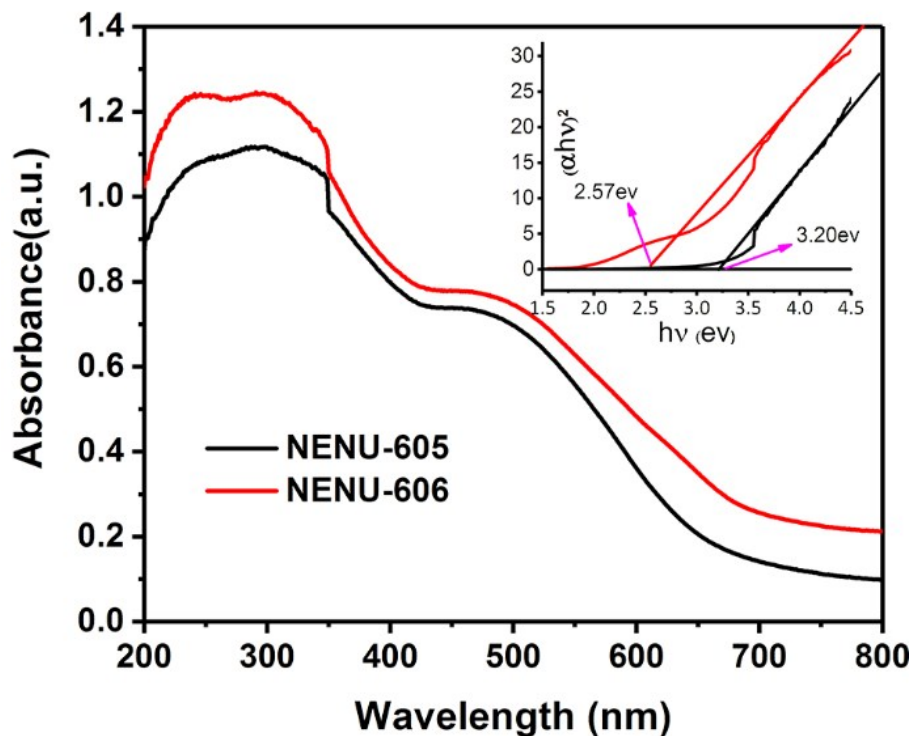

**Figure S11.** UV-vis diffuse reflectance spectra for **NENU-605** and **NENU-606** (inset: Diffuse reflectance UV-Vis spectrum of K-M function versus  $E$  (eV))

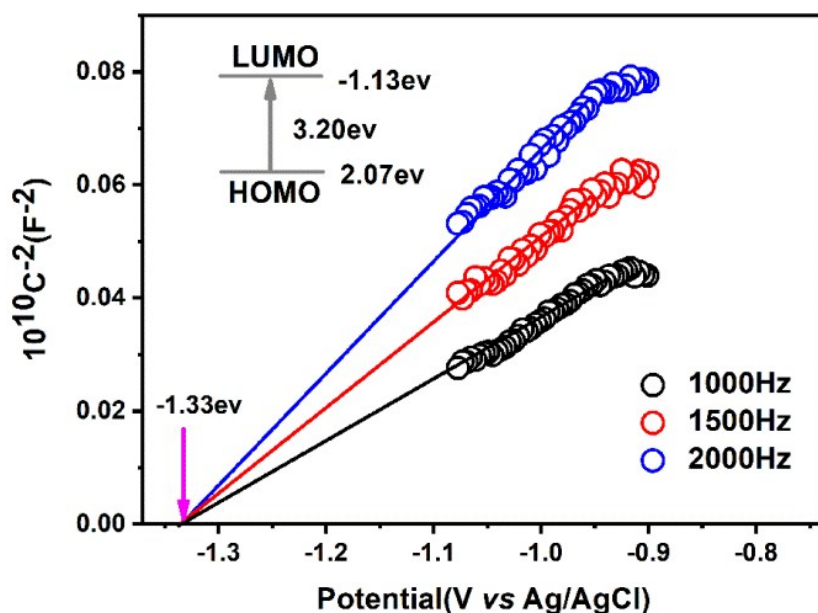

**Figure S12.** Mott-Schottky plot for **NENU-605** in 0.2 M  $\text{Na}_2\text{SO}_4$  aqueous solution. Inset: Energy diagram of the HOMO and LUMO levels of **NENU-605**.

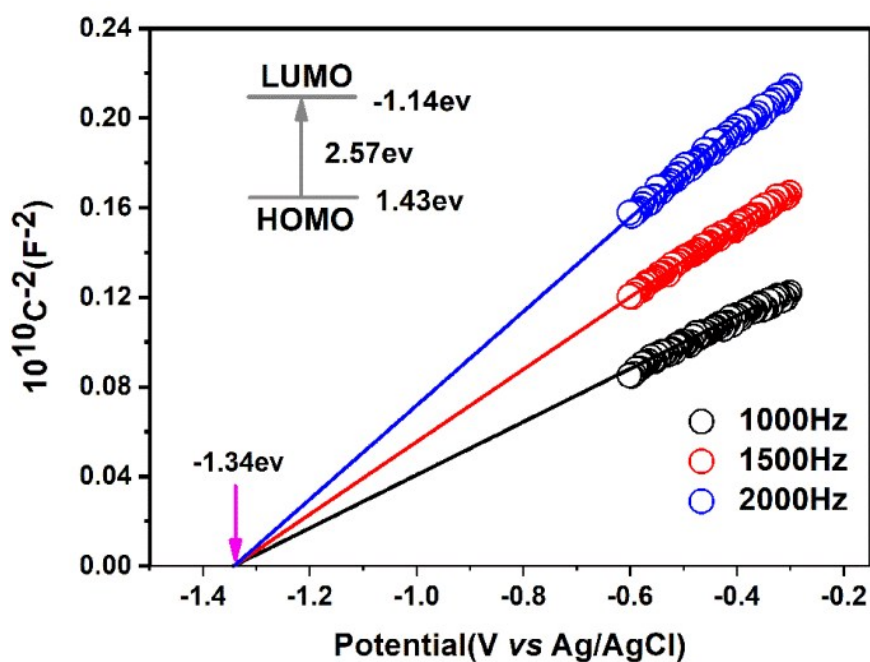

**Figure S13.** Mott-Schottky plot for **NENU-606** in 0.2 M  $\text{Na}_2\text{SO}_4$  aqueous solution. Inset: Energy diagram of the HOMO and LUMO levels of **NENU-606**

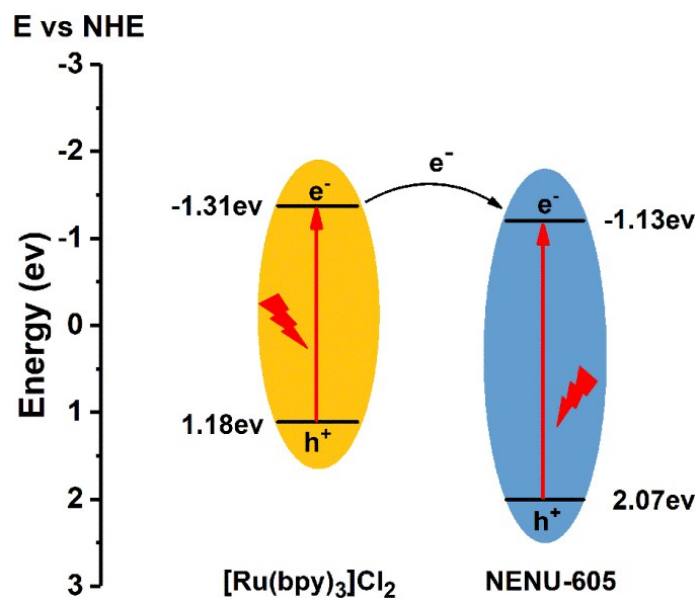

**Figure S14.** Schematic energy-level diagram showing electron transfer from  $[\text{Ru}(\text{bpy})_3]\text{Cl}_2$  to **NENU-605**.

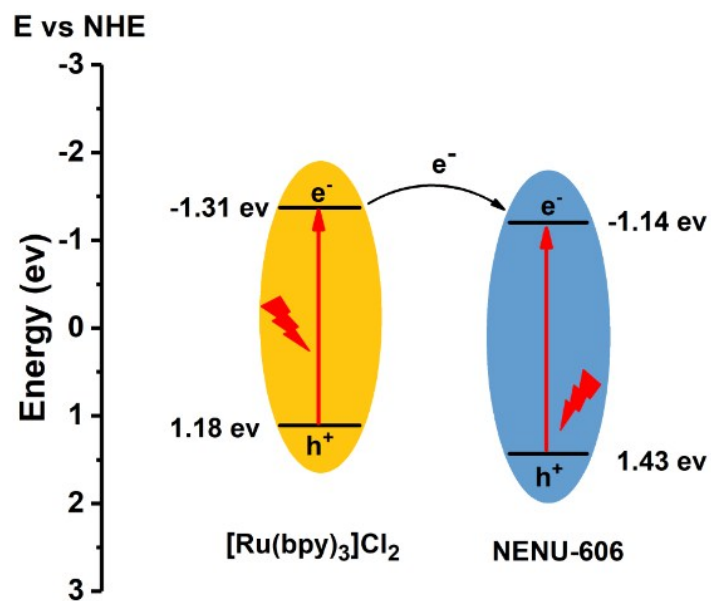

**Figure S15.** Schematic energy-level diagram showing electron transfer from  $[\text{Ru}(\text{bpy})_3]\text{Cl}_2$  to **NENU-606**.

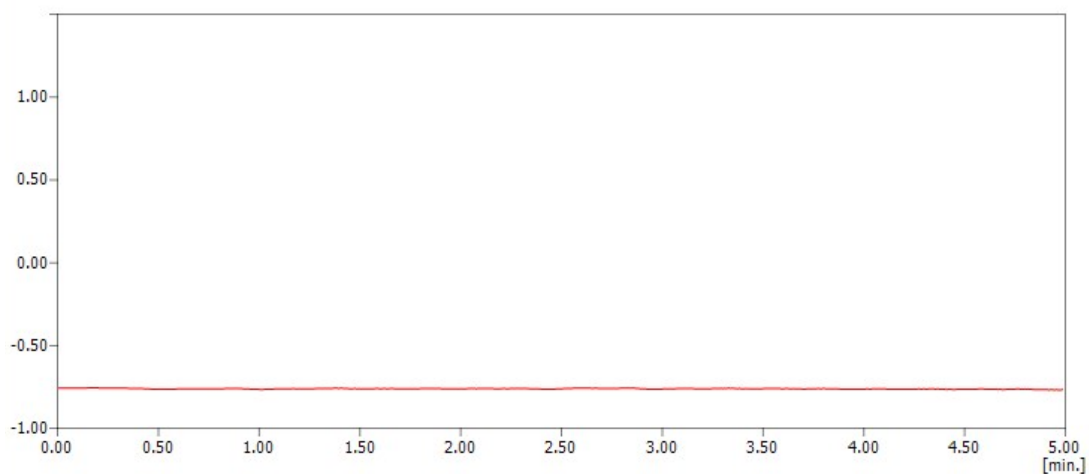

**Figure S16.** GC analysis of the gaseous reaction products by using the TCD.



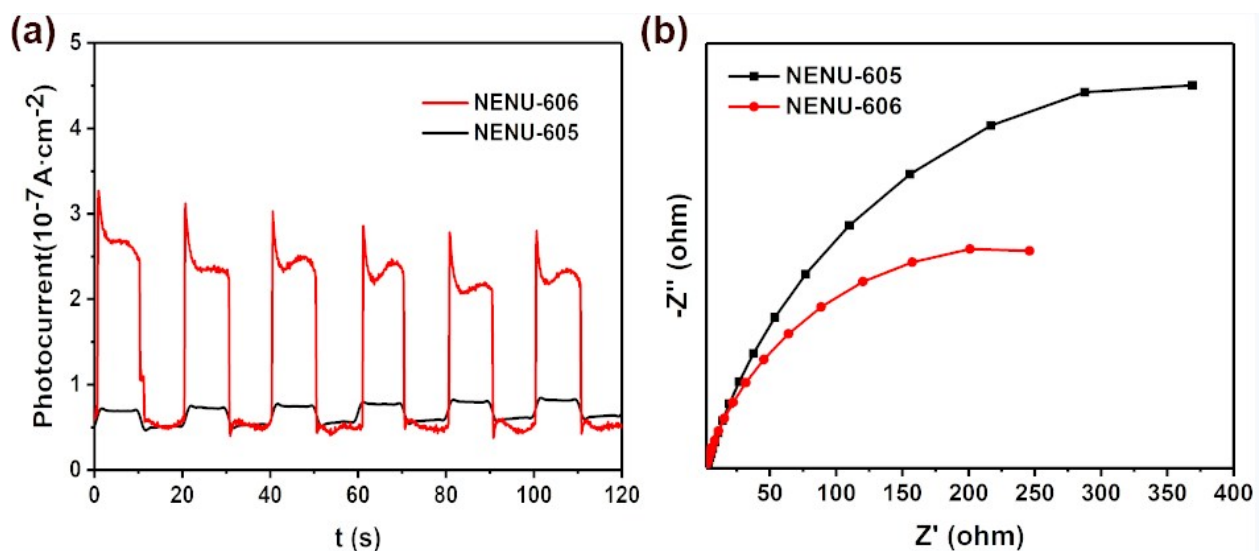

**Figure S17.** (a) Photocurrent responses and (b) EIS Nyquist plots.

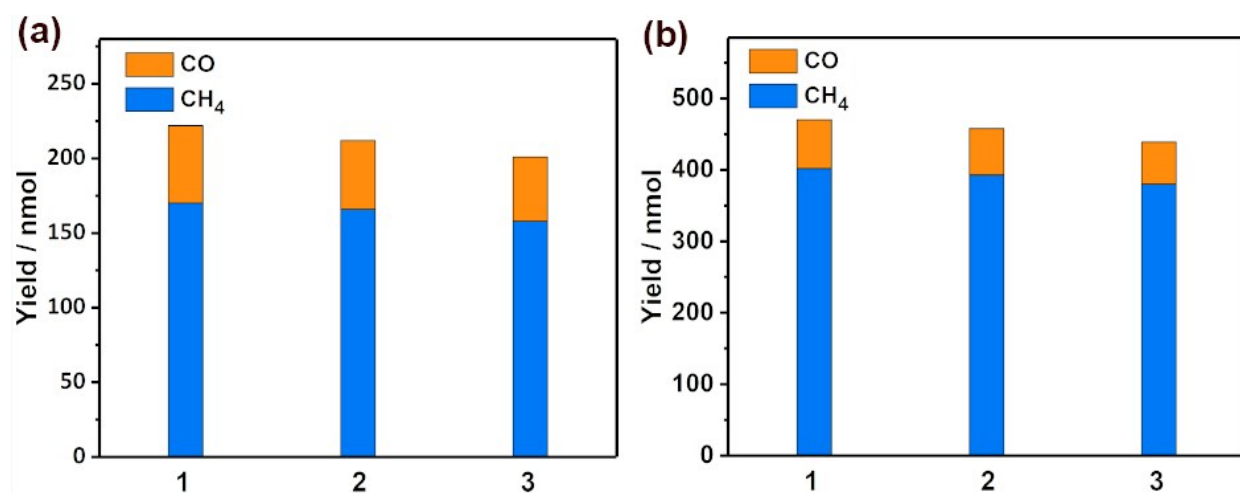

**Figure S18.** The recycle experiments of (a) **NENU-605** and (b) **NENU-606**, showing the durability of catalyst.

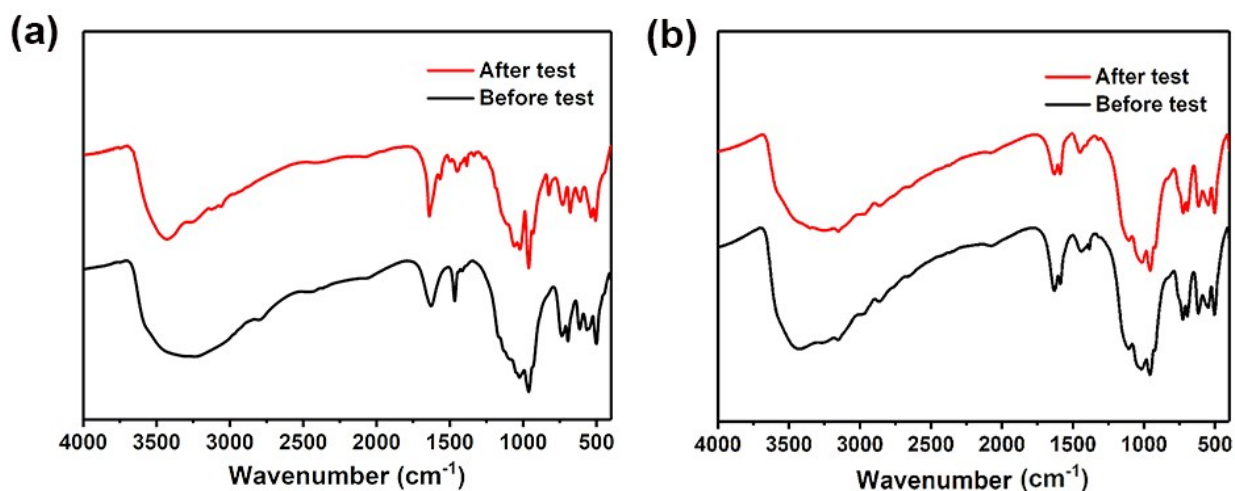

**Fig S19.** The IR spectra for **NENU-605** and **NENU-606** before and after reaction.

The characteristic peaks at 3440 cm<sup>-1</sup>, 1622 cm<sup>-1</sup> and 1456 cm<sup>-1</sup> associated with the lattice, coordinated and adsorbed water molecules. The characteristic peaks of {P<sub>4</sub>Mo<sub>6</sub>} at 1094, 1033, 966 and 733 cm<sup>-1</sup> are attributed to  $\nu(\text{P-O})$ ,  $\nu(\text{Mo-O})$  and  $\nu(\text{Mo-O-Mo})$  vibrations, respectively.

The IR spectra of (a) **NENU-605** and (b) **NENU-606** before and after photocatalytic test showing similar characteristics only with a slight shift indicates that they have the strong chemical stability towards photocatalytic CO<sub>2</sub> reduction reaction.

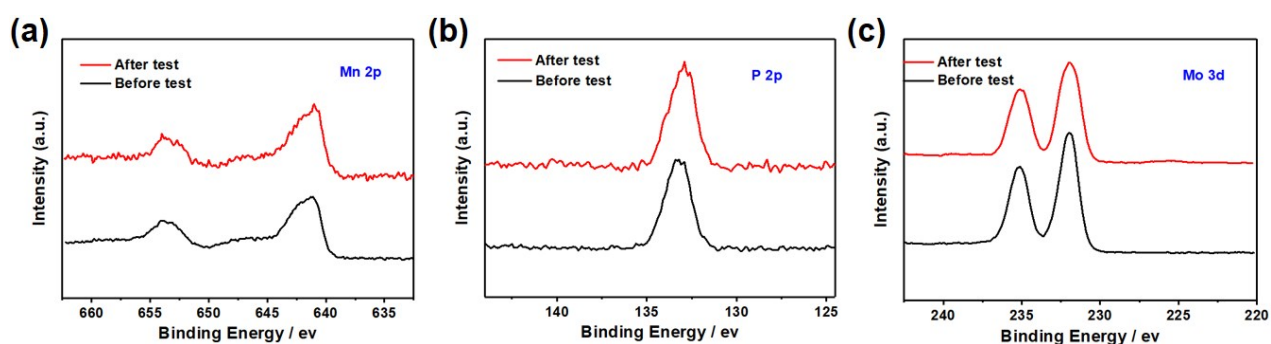

**Figure S20.** XPS analysis for Mn (a), P (b), Mo (c) in **NENU-605** before and after photocatalytic reduction reaction.

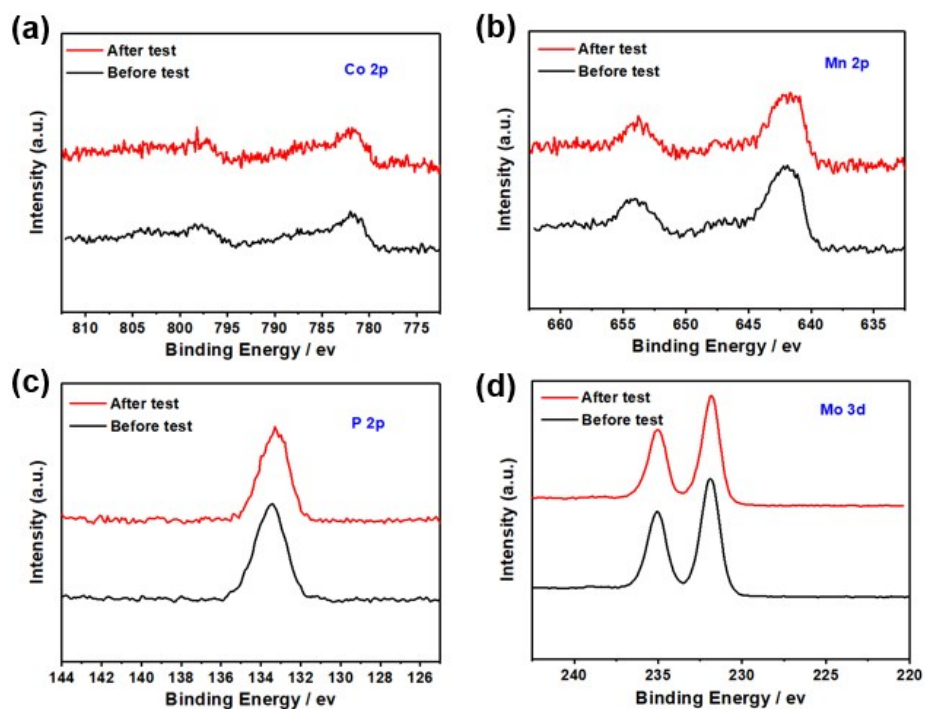

**Figure S21.** XPS analysis for Co (a), Mn (b), P (c), Mo (d) in **NENU-606** before and after photocatalytic reduction reaction.

As we can see from the **Figure S20 and S21**, nearly unchanged binding energies of the elements Mn 2p, Co 2p, P 2p and Mo 3d in high-resolution XPS spectra further demonstrated the structural stability of catalysts.

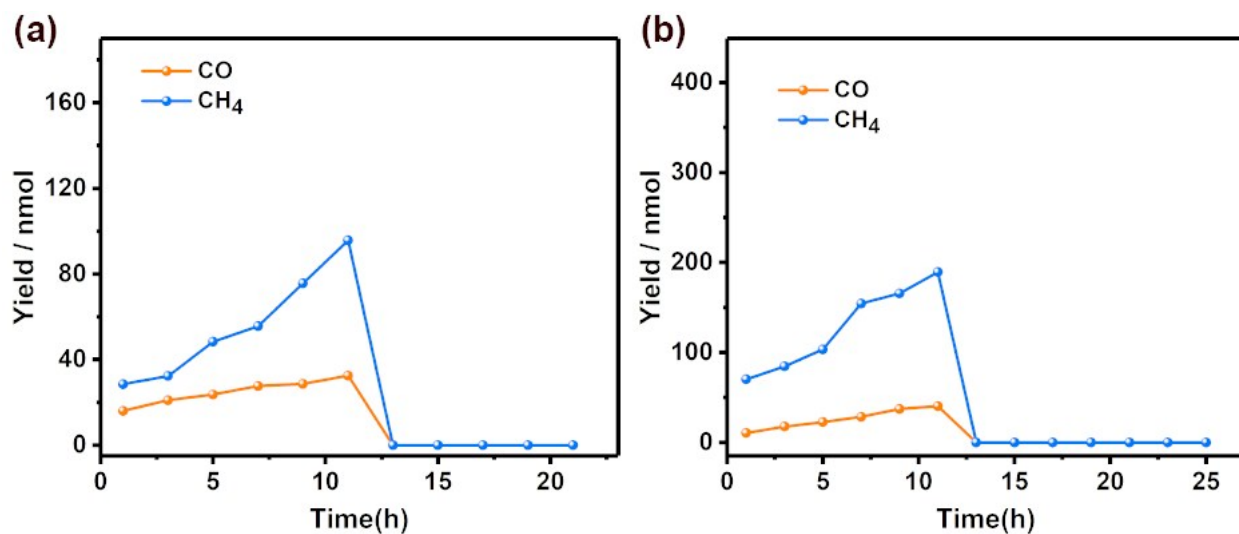

**Figure S22.** The additional filtrate reaction: **NENU-605** and **NENU-606** were removed from the photocatalytic system after 11 hours.

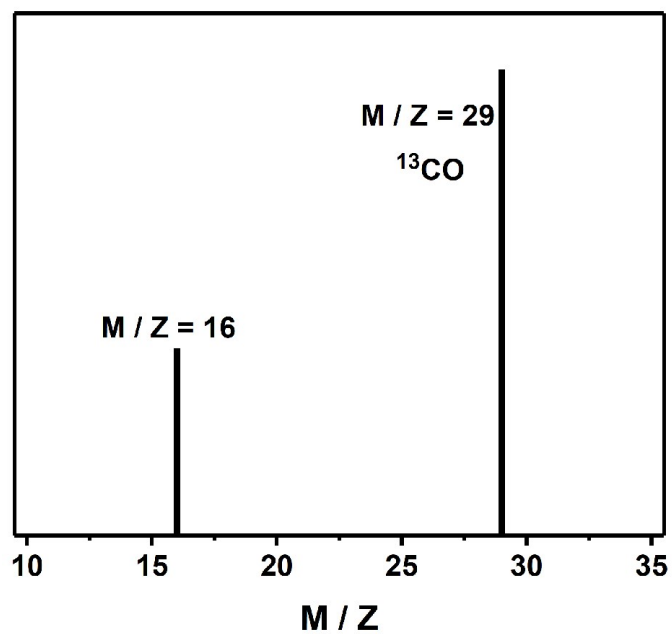

**Figure S23.** The Mass spectra analyses of  $^{13}\text{CO}$  recorded under a  $^{13}\text{CO}_2$  atmosphere.

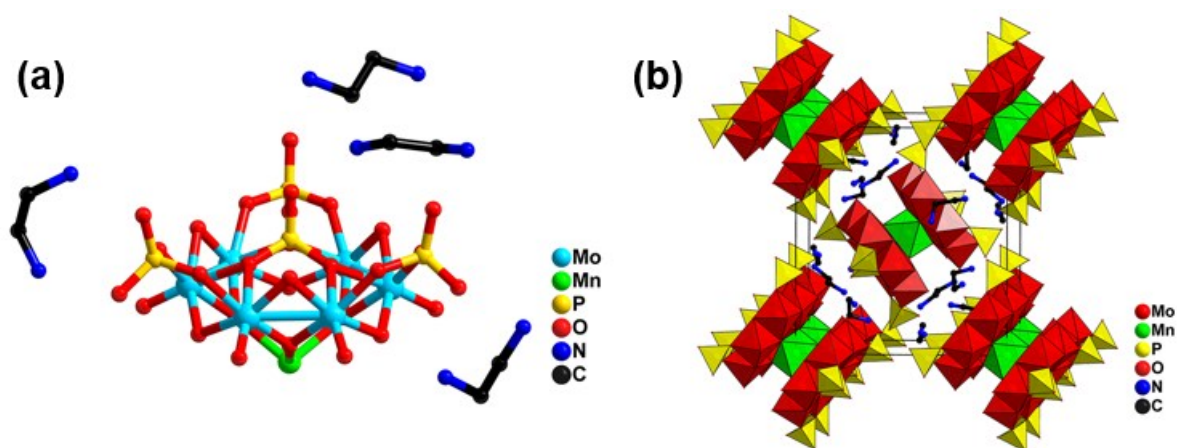

**Figure S24.** (a) The asymmetric unit of **NENU-607**. (b) Three-dimensional polyhedron stacking of **NENU-607**.

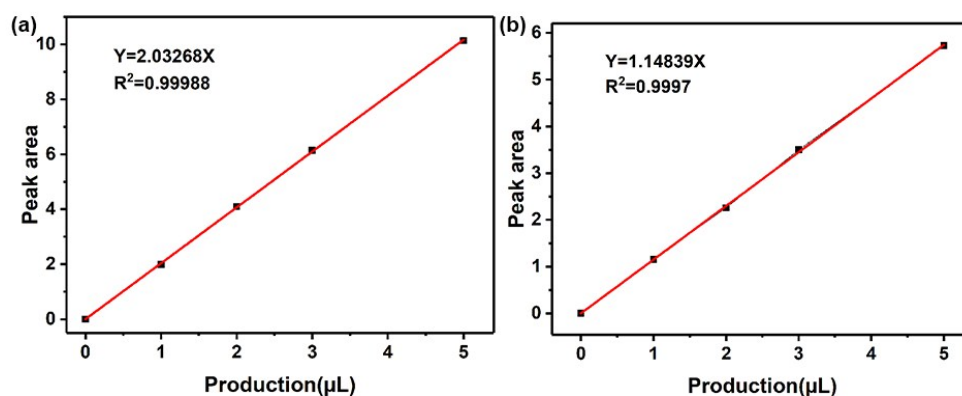

Figure S25. The standard curves of (a) CO and (b) CH<sub>4</sub>.

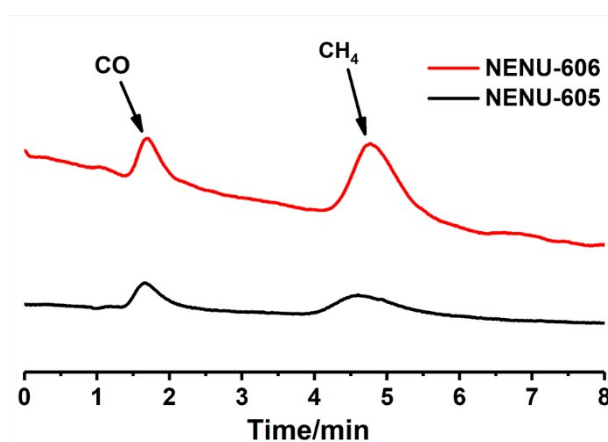

Figure S26. The GC on-line curves of NENU-605 and NENU-606.

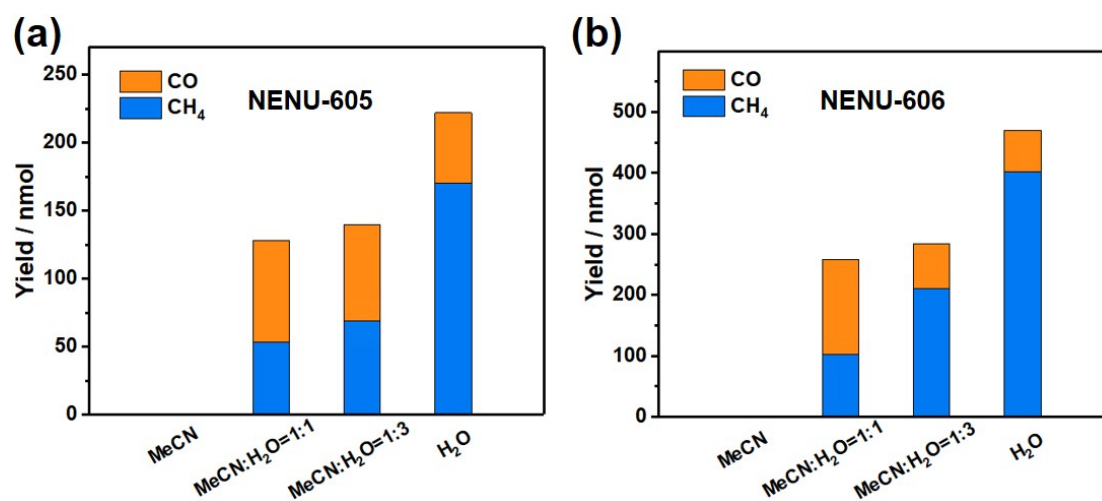

Figure S27. The influence of the reaction solvent on the photocatalytic CO<sub>2</sub> reduction reaction (MeCN: H<sub>2</sub>O = 1:0, 1:1, 1:3 and 0:1).

**Table S1. The research of reaction conditions**

| entry | catalyst | conditio<br>ns | CO<br>( $\mu\text{mol/g}$ ) | CH <sub>4</sub><br>( $\mu\text{mol/g}$ ) | CH <sub>4</sub> -TON<br>( $10^{-3}$ ) | CH <sub>4</sub> -TOF<br>( $10^{-3} \text{ h}^{-1}$ ) | All-TON<br>( $10^{-3}$ ) | All-TOF<br>( $10^{-3} \text{ h}^{-1}$ ) |
|-------|----------|----------------|-----------------------------|------------------------------------------|---------------------------------------|------------------------------------------------------|--------------------------|-----------------------------------------|
| 1     | a        | all            | 5.2                         | 17.0                                     | 104.1                                 | 5.5                                                  | 135.9                    | 7.2                                     |
| 2     | b        | all            | 6.8                         | 40.2                                     | 241.4                                 | 10.5                                                 | 282.2                    | 12.3                                    |
| 3     | a/b      | all            | n.d.                        | n.d.                                     |                                       |                                                      | -                        | -                                       |
| 4     | a/b      | all            | n.d.                        | n.d.                                     |                                       |                                                      | -                        | -                                       |
| 5     | a/b      | without<br>PS  | n.d.                        | n.d.                                     |                                       |                                                      | -                        | -                                       |
| 6     | n.d.     | all            | n.d.                        | n.d.                                     |                                       |                                                      | -                        | -                                       |
| 7     | a/b      | without<br>SD  | n.d.                        | n.d.                                     |                                       |                                                      | -                        | -                                       |
| 8     | d        | all            | 4.7                         | 7.0                                      | 15.2                                  | 0.75                                                 | 25.4                     | 1.3                                     |
| 9     | a/b      | MeCN           | n.d.                        | n.d.                                     |                                       |                                                      | -                        | -                                       |

Reaction conditions: PS = [Ru(bpy)<sub>3</sub>]Cl<sub>2</sub>·6H<sub>2</sub>O (0.01 mmol, ), catalyst (a = **NENU-605**, b = **NENU-606** or d = **NENU-607**) (10mg), H<sub>2</sub>O (28 mL), SD = TEOA (2 mL), CO<sub>2</sub> (1 atm),  $\lambda \geq 420$  nm, 20°C, TON = Turnover number (mol amount of CO or/and CH<sub>4</sub>) / (mol amount of catalyst), n.d.= Not detectable. 3 In the dark. 4 replacing CO<sub>2</sub> with N<sub>2</sub>. 5 Without [Ru(bpy)<sub>3</sub>] Cl<sub>2</sub>·6H<sub>2</sub>O. 6 Without the catalyst. 7 without sacrificial electron donor. 8 Using d = {P<sub>4</sub>Mo<sub>6</sub>} basic unit instead of a or b. 9 Altering H<sub>2</sub>O with dry MeCN.

**Table S2. Crystal data and structure refinement for NENU-605, NENU-606 and NENU-607**

| Compound                                       | NENU-605                                                                                                            | NENU-606                                                                                                              | NENU-607                                                                                           |
|------------------------------------------------|---------------------------------------------------------------------------------------------------------------------|-----------------------------------------------------------------------------------------------------------------------|----------------------------------------------------------------------------------------------------|
| Formula                                        | H <sub>308</sub> K <sub>16</sub> Mn <sub>40</sub> Mo <sub>96</sub> Na <sub>8</sub> O <sub>616</sub> P <sub>68</sub> | H <sub>280</sub> Co <sub>10</sub> Mn <sub>30</sub> Mo <sub>96</sub> Na <sub>24</sub> O <sub>602</sub> P <sub>68</sub> | C <sub>16</sub> H <sub>110</sub> MnMo <sub>12</sub> N <sub>16</sub> O <sub>74</sub> P <sub>8</sub> |
| <i>D</i> <sub>calc.</sub> / g cm <sup>-3</sup> | 2.570                                                                                                               | 2.588                                                                                                                 | 2.420                                                                                              |
| $\mu$ /mm <sup>-1</sup>                        | 3.141                                                                                                               | 3.128                                                                                                                 | 2.088                                                                                              |
| Formula Weight                                 | 25693.78                                                                                                            | 24715.70                                                                                                              | 3165.13                                                                                            |
| <i>T</i> /K                                    | 300.27                                                                                                              | 293.0                                                                                                                 | 296.15                                                                                             |
| Crystal System                                 | Tetragonal                                                                                                          | Tetragonal                                                                                                            | monoclinic                                                                                         |
| Space Group                                    | I41/acd                                                                                                             | I41/acd                                                                                                               | P21/n                                                                                              |
| <i>a</i> /Å                                    | 27.4698(12)                                                                                                         | 26.9679(5)                                                                                                            | 15.8641(14)                                                                                        |
| <i>b</i> /Å                                    | 27.4698(12)                                                                                                         | 26.9679(5)                                                                                                            | 15.9370(16)                                                                                        |
| <i>c</i> /Å                                    | 39.881(3)                                                                                                           | 41.1540(18)                                                                                                           | 17.1695(17)                                                                                        |
| $\alpha$ /°                                    | 90                                                                                                                  | 90                                                                                                                    | 90                                                                                                 |
| $\beta$ /°                                     | 90                                                                                                                  | 90                                                                                                                    | 92.645(2)                                                                                          |
| $\gamma$ /°                                    | 90                                                                                                                  | 90                                                                                                                    | 90                                                                                                 |
| <i>V</i> /Å <sup>3</sup>                       | 30093(4)                                                                                                            | 29930.0(17)                                                                                                           | 4336.3(7)                                                                                          |
| <i>Z</i>                                       | 2                                                                                                                   | 2                                                                                                                     | 2                                                                                                  |
| <i>F</i> (000)                                 | 21848.0                                                                                                             | 21888.0                                                                                                               | 4336.3(7)                                                                                          |
| Radiation type                                 | MoK <sub>α</sub> (λ = 0.71073)                                                                                      | MoK <sub>α</sub> (λ = 0.71073)                                                                                        | MoK <sub>α</sub> (λ = 0.71073)                                                                     |
| $\theta$ <sub>min</sub> /°                     | 2.928                                                                                                               | 2.768                                                                                                                 | 1.744                                                                                              |
| $\theta$ <sub>max</sub> /°                     | 25.703                                                                                                              | 27.502                                                                                                                | 27.721                                                                                             |
| Reflections collected                          | 91557                                                                                                               | 83160                                                                                                                 | 57163                                                                                              |
| Independent Refl.                              | 7150                                                                                                                | 8600                                                                                                                  | 10042                                                                                              |
| <i>R</i> <sub>int</sub>                        | 0.0619                                                                                                              | 0.0348                                                                                                                | 0.0426                                                                                             |
| Goof                                           | 1.089                                                                                                               | 1.041                                                                                                                 | 1.186                                                                                              |
| <i>wR</i> <sub>2</sub> (all data)              | 0.1360                                                                                                              | 0.0768                                                                                                                | 0.1144                                                                                             |
| <i>wR</i> <sub>2</sub>                         | 0.1149                                                                                                              | 0.0736                                                                                                                | 0.0985                                                                                             |
| <i>R</i> <sub>1</sub> (all data)               | 0.0747                                                                                                              | 0.040                                                                                                                 | 0.0625                                                                                             |
| <i>R</i> <sub>1</sub>                          | 0.0479                                                                                                              | 0.0316                                                                                                                | 0.0418                                                                                             |
| Largest residuals [e Å <sup>-3</sup> ]         | 1.25/-1.14                                                                                                          | 1.51/-1.15                                                                                                            | 1.28/-1.18                                                                                         |

$${}^aR_1 = \frac{\sum ||F_o| - |F_c||}{\sum |F_o|} \cdot {}^b wR_2 = \frac{|\sum w(|F_o|^2 - |F_c|^2)|}{\sum w(F_o^2)^2}^{1/2}$$

**Table S3. The selected bond Lengths in Å for NENU-605.**

| Atom | Atom | Length/Å   | Atom | Atom             | Length/Å |
|------|------|------------|------|------------------|----------|
| Mo1  | Mo2  | 2.5945(11) | Mo5  | O16              | 1.946(6) |
| Mo1  | O1   | 2.293(5)   | Mo5  | O17              | 2.057(6) |
| Mo1  | O5   | 1.964(5)   | Mo5  | O24              | 1.679(6) |
| Mo1  | O9   | 2.090(6)   | Mo6  | O1               | 2.249(6) |
| Mo1  | O13  | 1.932(6)   | Mo6  | O6               | 1.966(6) |
| Mo1  | O14  | 2.070(6)   | Mo6  | O9               | 2.113(6) |
| Mo1  | O22  | 1.675(6)   | Mo6  | O15              | 2.062(6) |
| Mo2  | O2   | 2.283(5)   | Mo6  | O16              | 1.944(6) |
| Mo2  | O5   | 1.968(6)   | Mo6  | O23              | 1.673(7) |
| Mo2  | O8   | 2.101(6)   | Mn1  | O5               | 2.182(6) |
| Mo2  | O12  | 2.053(6)   | Mn1  | O5 <sup>1</sup>  | 2.182(6) |
| Mo2  | O13  | 1.942(6)   | Mn1  | O6               | 2.260(6) |
| Mo2  | O21  | 1.670(6)   | Mn1  | O6 <sup>1</sup>  | 2.260(6) |
| Mo3  | Mo4  | 2.6075(11) | Mn1  | O7               | 2.165(6) |
| Mo3  | O2   | 2.283(6)   | Mn1  | O7 <sup>1</sup>  | 2.165(6) |
| Mo3  | O7   | 1.971(6)   | Mn2  | O4               | 2.107(6) |
| Mo3  | O8   | 2.079(6)   | Mn2  | O019             | 2.280(8) |
| Mo3  | O11  | 2.049(6)   | Mn2  | O27              | 2.061(7) |
| Mo3  | O19  | 1.946(6)   | Mn2  | O29 <sup>3</sup> | 2.242(7) |
| Mo3  | O20  | 1.678(6)   | Mn2  | O31 <sup>2</sup> | 2.148(7) |
| Mo4  | O3   | 2.249(6)   | Mn2  | O32 <sup>2</sup> | 2.189(8) |
| Mo4  | O7   | 1.984(6)   | Mn3  | O26 <sup>4</sup> | 2.151(7) |
| Mo4  | O10  | 2.107(6)   | Mn3  | O26 <sup>2</sup> | 2.215(7) |
| Mo4  | O18  | 2.032(7)   | Mn3  | O28 <sup>5</sup> | 2.047(8) |
| Mo4  | O19  | 1.938(6)   | Mn3  | O30              | 2.065(7) |
| Mo4  | O25  | 1.673(6)   | Mn3  | O33              | 2.299(8) |
| Mo5  | Mo6  | 2.5879(10) | P1   | O1               | 1.553(6) |
| Mo5  | O3   | 2.274(6)   | P1   | O2               | 1.545(6) |
| Mo5  | O6   | 1.975(6)   | P1   | O3               | 1.551(6) |
| Mo5  | O10  | 2.126(6)   | P1   | O4               | 1.501(6) |



| Atom | Atom             | Length/Å |
|------|------------------|----------|
| P2   | O14              | 1.555(6) |
| P2   | O15              | 1.527(6) |
| P2   | O26              | 1.529(6) |
| P2   | O27              | 1.507(7) |
| P3   | O11              | 1.550(7) |
| P3   | O12              | 1.531(6) |
| P3   | O28              | 1.520(8) |
| P3   | O29              | 1.508(8) |
| P4   | O17              | 1.534(7) |
| P4   | O18              | 1.543(7) |
| P4   | O30              | 1.524(7) |
| P4   | O31              | 1.532(7) |
| P5   | O32              | 1.515(8) |
| P5   | O32 <sup>2</sup> | 1.515(8) |
| P5   | O32 <sup>3</sup> | 1.515(8) |
| P5   | O32 <sup>5</sup> | 1.515(8) |

| Atom | Atom             | Length/Å |
|------|------------------|----------|
| Na1  | O16 <sup>2</sup> | 2.611(7) |
| Na1  | O16              | 2.611(7) |
| Na1  | O17 <sup>2</sup> | 2.861(7) |
| Na1  | O17              | 2.861(7) |
| Na1  | O31              | 2.373(8) |
| Na1  | O31 <sup>2</sup> | 2.373(8) |
| O019 | K1 <sup>3</sup>  | 2.400(9) |
| O26  | Mn3 <sup>6</sup> | 2.151(7) |
| O26  | Mn3 <sup>2</sup> | 2.215(7) |
| O28  | Mn3 <sup>3</sup> | 2.047(8) |
| O29  | Mn2 <sup>5</sup> | 2.242(7) |
| O29  | K1 <sup>3</sup>  | 2.162(8) |
| O31  | Mn2 <sup>2</sup> | 2.148(7) |
| O32  | Mn2 <sup>2</sup> | 2.189(8) |

<sup>1</sup>3/2-x, +y, 1-z; <sup>2</sup>1-x, 3/2-y, +z; <sup>3</sup>-1/4+y, 5/4-x, 3/4-z;  
<sup>4</sup>+x, 1/2+y, 1-z; <sup>5</sup>5/4-y, 1/4+x, 3/4-z; <sup>6</sup>+x, -1/2+y, 1-

<sup>1</sup>+y, +x, +z; <sup>2</sup>+y, +z, +x; <sup>3</sup>1-z, 1-x, 1-y; <sup>4</sup>+z, +x, +y; <sup>5</sup>1-y, 1-z, 1-x;  
<sup>6</sup>1-x, 1-y, 1-z; <sup>7</sup>3/2-x, 3/2-y, +z; <sup>8</sup>+x, 3/2-y, 3/2-z; <sup>9</sup>3/2-x, +y, 3/2-z;  
<sup>10</sup>+z, +y, +x; <sup>11</sup>3/2-y, 3/2-z, +x; <sup>12</sup>+z, 3/2-x, 3/2-y;  
<sup>13</sup>-1/2+y, 1/2+x, 1-z; <sup>14</sup>1-x, 1/2+z, -1/2+y;  
<sup>15</sup>+x, +z, +y

**Table S4: The selected bond Lengths in Å for NENU-606.**

| Atom | Atom             | Length/Å  |
|------|------------------|-----------|
| Mo1  | Mo2              | 2.5916(5) |
| Mo1  | O4               | 2.332(3)  |
| Mo1  | O7               | 2.085(3)  |
| Mo1  | O8               | 1.976(3)  |
| Mo1  | O12              | 1.938(3)  |
| Mo1  | O17              | 2.048(3)  |
| Mo1  | O22              | 1.674(3)  |
| Mo2  | O1               | 2.274(3)  |
| Mo2  | O5               | 2.099(3)  |
| Mo2  | O8               | 1.976(3)  |
| Mo2  | O12              | 1.937(3)  |
| Mo2  | O18              | 2.031(3)  |
| Mo2  | O23              | 1.683(3)  |
| Mo3  | Mo4              | 2.5916(5) |
| Mo3  | O1               | 2.272(3)  |
| Mo3  | O5               | 2.103(3)  |
| Mo3  | O9               | 1.978(3)  |
| Mo3  | O13              | 1.943(3)  |
| Mo3  | O19              | 2.047(3)  |
| Mo3  | O24              | 1.675(3)  |
| Mo4  | O2               | 2.252(3)  |
| Mo4  | O6               | 2.115(3)  |
| Mo4  | O9               | 1.978(3)  |
| Mo4  | O13              | 1.948(3)  |
| Mo4  | O14              | 2.045(3)  |
| Mo4  | O25              | 1.680(3)  |
| Mo5  | Mo6              | 2.5979(5) |
| Mo5  | O2               | 2.278(3)  |
| Mo5  | O6               | 2.098(3)  |
| Mo5  | O10              | 1.971(3)  |
| Mo5  | O11              | 1.949(3)  |
| Mo5  | O15              | 2.044(3)  |
| Mo5  | O20              | 1.680(3)  |
| Mo6  | O4               | 2.271(3)  |
| Mo6  | O7               | 2.107(3)  |
| Mo6  | O10              | 1.976(3)  |
| Mo6  | O11              | 1.941(3)  |
| Mo6  | O16              | 2.047(3)  |
| Mo6  | O21              | 1.677(3)  |
| Mn1  | O8               | 2.151(3)  |
| Mn1  | O8 <sup>1</sup>  | 2.151(3)  |
| Mn1  | O9 <sup>1</sup>  | 2.175(3)  |
| Mn1  | O9               | 2.175(3)  |
| Mn1  | O10 <sup>1</sup> | 2.165(3)  |
| Mn1  | O10              | 2.165(3)  |
| Mn2  | O3               | 2.146(3)  |
| Mn2  | O27 <sup>3</sup> | 2.153(4)  |
| Mn2  | O28 <sup>2</sup> | 2.092(3)  |
| Mn2  | O31              | 2.137(6)  |
| Mn2  | O32 <sup>2</sup> | 2.272(7)  |

| Atom | Atom             | Length/Å |
|------|------------------|----------|
| Mn2  | O33 <sup>3</sup> | 2.194(4) |
| Mn3  | O26 <sup>3</sup> | 2.026(4) |
| Mn3  | O29 <sup>2</sup> | 2.052(4) |
| Mn3  | O30              | 2.425(7) |
| Mn3  | O30 <sup>4</sup> | 2.052(5) |
| Mn3  | O31              | 2.316(5) |
| P1   | O1               | 1.549(3) |
| P1   | O2               | 1.553(3) |
| P1   | O3               | 1.502(3) |
| P1   | O4               | 1.550(3) |
| P2   | O16              | 1.543(3) |
| P2   | O17              | 1.546(3) |
| P2   | O26              | 1.511(4) |
| P2   | O27              | 1.504(4) |
| P3   | O18              | 1.556(3) |
| P3   | O19              | 1.548(3) |
| P3   | O28              | 1.511(3) |
| P3   | O29              | 1.516(3) |
| P4   | O14              | 1.526(3) |
| P4   | O15              | 1.529(3) |
| P4   | O30              | 1.489(4) |
| P4   | O31              | 1.518(4) |
| P5   | O32              | 1.520(7) |
| P5   | O32 <sup>3</sup> | 1.520(7) |
| P5   | O32 <sup>5</sup> | 1.520(7) |
| P5   | O32 <sup>2</sup> | 1.520(7) |
| Na1  | O13 <sup>2</sup> | 2.591(4) |
| Na1  | O13              | 2.591(4) |
| Na1  | O19              | 2.798(4) |
| Na1  | O19 <sup>2</sup> | 2.798(4) |
| Na1  | O28              | 2.331(4) |
| Na1  | O28 <sup>2</sup> | 2.331(4) |
| Na2  | O12              | 2.258(4) |
| Na2  | O18              | 2.728(4) |
| Na2  | O27 <sup>5</sup> | 2.252(5) |
| Na2  | O28              | 2.806(5) |
| Na2  | O32              | 2.236(8) |
| Na2  | O33              | 2.454(5) |
| O26  | Mn3 <sup>5</sup> | 2.026(4) |
| O27  | Mn2 <sup>5</sup> | 2.153(4) |
| O27  | Na2 <sup>3</sup> | 2.252(5) |
| O28  | Mn2 <sup>2</sup> | 2.092(3) |
| O29  | Mn3 <sup>2</sup> | 2.052(4) |
| O30  | Mn3 <sup>4</sup> | 2.052(5) |
| O32  | Mn2 <sup>2</sup> | 2.272(7) |
| O33  | Mn2 <sup>5</sup> | 2.194(4) |

<sup>1</sup>+x,1-y,1/2-z; <sup>2</sup>1-x,3/2-y, +z; <sup>3</sup>-1/4+y,5/4-x,3/4-z; <sup>4</sup>1/2-x,3/2-y,1/2-z; <sup>5</sup>5/4-y,1/4+x,3/4

## Reference:

- [1] D. Leggas, O. V. Tsodikov, *Acta Cryst. A* **2015**, *71*, 319-324.
- [2] O. V. Dolomanov, L. J. Bourhis, R. J. Gildea, J. A. K. Howard, H. Puschmann, *J. Appl. Crystallogr.* **2009**, *42*, 339-341.
- [3] A. Spek, *Acta Cryst. C* **2015**, *71*, 9-18.
- [4] A. Spek, *Acta Cryst. D* **2009**, *65*, 148-155.
- [5] E. V. Alexandrov, V. A. Blatov, A. V. Kochetkov, D. M. Proserpio, *CrystEngComm* **2011**, *13*, 3947-3958.
